# Supplementary material
Source: PubMed Central journal article supplement (PMC4612866)
Supplement: ijcem0008-12674-f5.pdf [file ijcem0008-12674-f5.pdf]

## *NOTCH3* in vascular smooth muscle cells

**Table S1.** Primers

| Primer                      | Sequence               | Tm   | Length of target sequence |
|-----------------------------|------------------------|------|---------------------------|
| <i>NOTCH3</i> -F1 (bp5680)  | AACCGCTCTACAGACTTGGATG | 58.7 | 157 bp                    |
| <i>NOTCH3</i> -R1 (bp5836C) | CCCAGTGTAAGGCTGATTCC   | 58.9 |                           |
| Human ACTB-F (bp877)        | TCCTTCCTGGGCATGGAGT    | 60.5 | 208 bp                    |
| Human ACTB-R (bp1084C)      | CAGGAGGAGCAATGATCTTGAT | 60.2 |                           |
